# Supplementary material for: Including phase separation in a unified model to calculate partitioning of vapours to mixed inorganic–organic aerosol particles
Source: Royal Society of Chemistry journal article supplement (doi:10.1039/c3fd00047h), 2013-01-01
Supplement: c3fd00047h.pdf [file c3fd00047h.pdf]

# Supplementary material: Including phase separation in a unified model to calculate partitioning of vapours to mixed inorganic-organic aerosol particles<sup>†</sup>

David Topping<sup>\*a</sup>, Mark Barley<sup>b‡</sup> and Gordon McFiggans<sup>b</sup>

Received Xth XXXXXXXXXXXX 20XX, Accepted Xth XXXXXXXXXXXX 20XX

First published on the web Xth XXXXXXXXXXXX 200X

DOI: 10.1039/c000000x

## 1 Derivation of partitioning coefficients between two liquid phases

A component  $i$  at chemical equilibrium between two liquid phases satisfies the following expression:

$$x_i^\alpha f_i^\alpha = x_i^\beta f_i^\beta \quad (1)$$

where  $x_i^\alpha$  is the mole fraction in phase  $\alpha$  and  $f_i^\alpha$  the mole fraction based activity coefficient in phase  $\alpha$ . Both are calculated using the following expressions:

$$x_i^\alpha = \frac{n_i^\alpha}{N_T^\alpha}; x_i^\beta = \frac{n_i^\beta}{N_T^\beta} \quad (2)$$

where  $n_i^\alpha$  is the number of moles of component  $i$  in phase  $\alpha$ ,  $N_T^\alpha$  the total number of moles in phase  $\alpha$ ,  $n_i^\beta$  is the number of moles of component  $i$  in phase  $\beta$  and  $N_T^\beta$  the total number of moles in phase  $\beta$ . The total number of moles in each phase is simply a summation of each contributing compound in that phase:

$$N_T^\alpha = \sum_j n_j^\alpha; N_T^\beta = \sum_j n_j^\beta \quad (3)$$

As the total number of moles of each compound remain fixed ( $n_i^T$ ), the amount in each phase can be related using the following:

$$n_i^\alpha = n_i^T - n_i^\beta \quad (4)$$

---

which can be expressed in terms of mole fractions:

$$n_i^\alpha = n_i^T - x_i^\beta N_T^\beta \quad (5)$$

Using equation 1, the total amount of component  $i$  in phase  $\alpha$  can be related to both  $f_i^\alpha$  and  $f_i^\beta$  with the following expressions:

$$n_i^\alpha = n_i^T - \left[ \frac{x_i^\alpha f_i^\alpha}{f_i^\beta} \right] N_T^\beta \quad (6)$$

$$n_i^\alpha = n_i^T - n_i^\alpha \left[ \frac{N_T^\beta f_i^\alpha}{N_T^\alpha f_i^\beta} \right] \quad (7)$$

$$n_i^\alpha = \left[ 1 + \frac{N_T^\beta f_i^\alpha}{N_T^\alpha f_i^\beta} \right]^{-1} n_i^T \quad (8)$$

(9)

Which can be further simplified to:

$$n_i^\alpha = \left[ 1 + \left( \frac{N_T}{N_T^\alpha} - 1 \right) \frac{f_i^\alpha}{f_i^\beta} \right]^{-1} n_i^T \quad (10)$$

Hence, the partitioning coefficient between two liquid phases is given by:

$$\left[ 1 + \left( \frac{N_T}{N_T^\alpha} - 1 \right) \frac{f_i^\alpha}{f_i^\beta} \right]^{-1} \quad (11)$$
